# Supplementary material for: The rational design of nickel-cobalt selenides@selenium nanostructures by adjusting the synthesis environment for high-performance sodium-ion batteries
Source: Royal Society of Chemistry journal article supplement (doi:10.1039/d1qi01390d), 2021-12-15
Supplement: d1qi01390d1.pdf [file d1qi01390d1.pdf]

## Supporting Information

# Rational design of nickel-cobalt selenides@selenium nanostructure by adjusting the synthesis environment for high performance sodium-ion batteries

*Xiaofei Wang<sup>a\*</sup>, Chenchen Pei<sup>a</sup>, Qian Wang<sup>b\*</sup>, Yue Hu<sup>a</sup>, Hui Wang<sup>c</sup>, Haixing Liu<sup>a</sup>,*

*Lifeng Zhang<sup>a</sup>, Shouwu Guo<sup>a,d\*</sup>*

<sup>a</sup> School of Materials Science and Engineering, Shaanxi Key Laboratory of Green Preparation and Functionalization for Inorganic Materials, Shaanxi University of Science and Technology, Xi'an, 710021, PR China

<sup>b</sup> School of Materials Science and Chemical Engineering, Xi'an Technological University, Xi'an Middle Xuefu Road No. 2, PR China

<sup>c</sup> Interdisciplinary Materials Research Center, Institute for Advanced Study, Chengdu University, Chengdu, 610106, China

<sup>d</sup> Department of Electronic Engineering, School of Electronic Information and Electrical Engineering, Shanghai Jiao Tong University, Shanghai 200240, PR China

\*Corresponding authors:

Tel.:+86 02986173324; +86 029 86168688

E-mail: [wangxiaof@sust.edu.cn](mailto:wangxiaof@sust.edu.cn) (X.F. Wang);

E-mail: [drifting\\_leaf@126.com](mailto:drifting_leaf@126.com) (Q. Wang);

E-mail: [swguo@sjtu.edu.cn](mailto:swguo@sjtu.edu.cn) (S.W. Guo)

**Table S1** ICP-OES analysis results of the fabricated nanocomposites

| Number                                 | Element | Element content in the sample<br>C <sub>x</sub> (mg/L) |
|----------------------------------------|---------|--------------------------------------------------------|
| NiCoSe <sub>2</sub> -G                 | Co      | 0.465                                                  |
| NiCoSe <sub>2</sub> @Se-L <sub>6</sub> | Co      | 0.472                                                  |
| NiCoSe <sub>2</sub> -G                 | Ni      | 1.058                                                  |
| NiCoSe <sub>2</sub> @Se-L <sub>6</sub> | Ni      | 1.076                                                  |

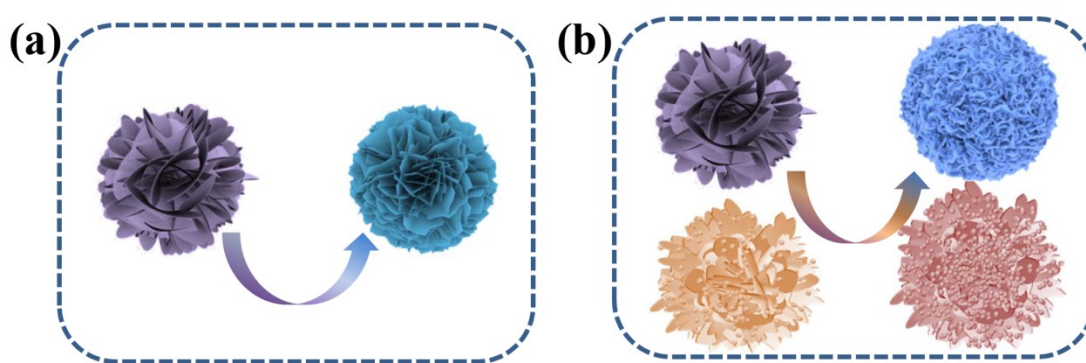

**Figure S1.** The schematic illustrations of the evolution process that fabricated under (a) gas and (b) liquid phase strategies.

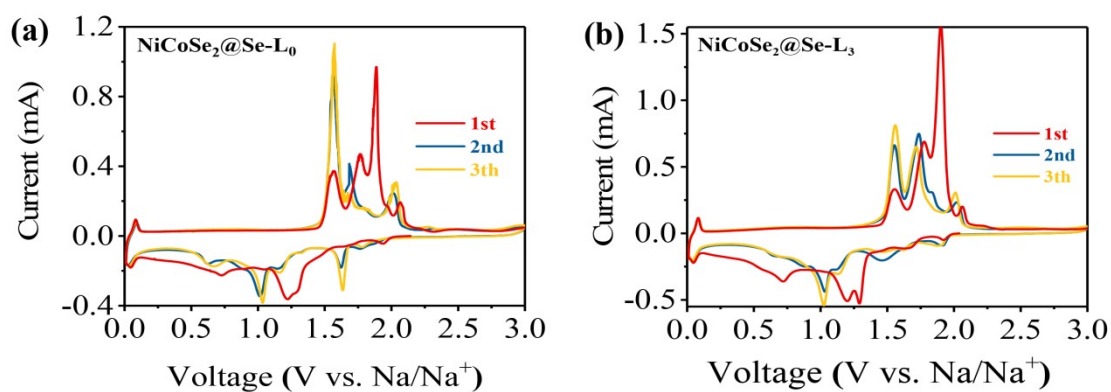

**Figure S2.** The first three CV curves of the (a) NiCoSe<sub>2</sub>@Se-L<sub>0</sub> and (b) NiCoSe<sub>2</sub>@Se-L<sub>3</sub> electrodes.

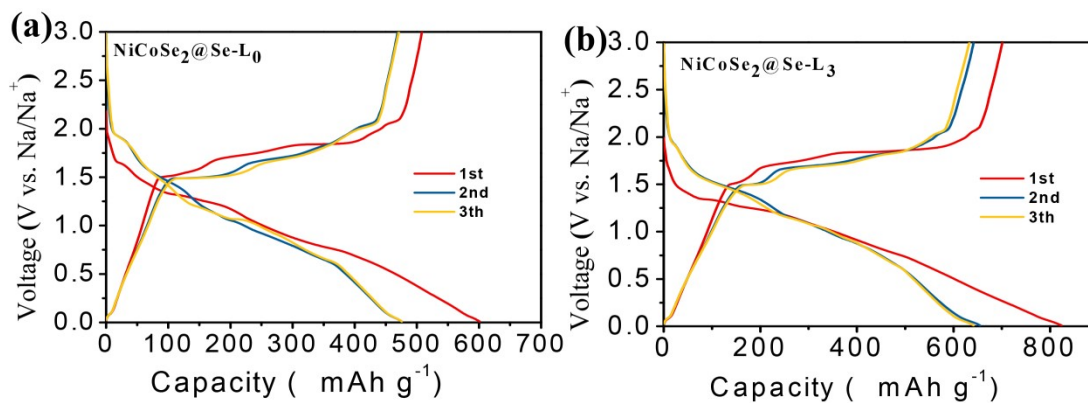

**Figure S3.** The first three discharge and charge curves of the (a) NiCoSe<sub>2</sub>@Se-L<sub>0</sub> and (b) NiCoSe<sub>2</sub>@Se-L<sub>3</sub> electrodes.

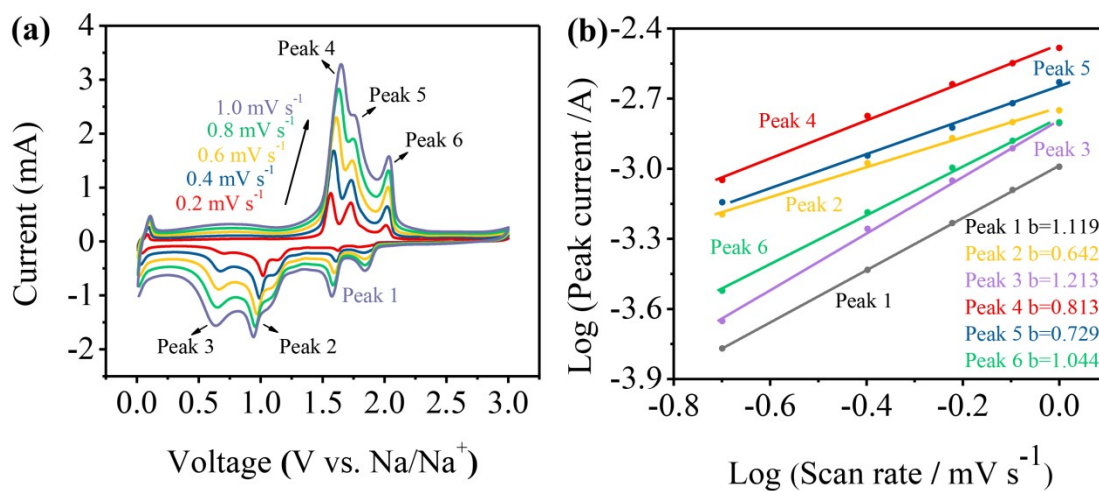

**Figure S4.** (a) CV curves of the NiCoSe<sub>2</sub>@Se-L<sub>3</sub> electrode at different scan rates; (b) Corresponding log (peak current) vs log (scan rate) at six peaks.
